# Supplementary material for: Enzyme Commission Number Prediction and Benchmarking with Hierarchical Dual-core Multitask Learning Framework
Source: PubMed Central journal article supplement (PMC10232324; doi:10.34133/research.0153), 2023-05-31
Supplement: research.0153.f1.pdf [file research.0153.f1.pdf]

# ECRECEr: Enzyme Commission Number Prediction and Benchmarking with Hierarchy Dual-core Multitask Learning Framework

Zhenkun Shi<sup>1, 2</sup>, Rui Deng<sup>3</sup>, Qianqian Yuan<sup>1, 2</sup>, Zhitao Mao<sup>1, 2</sup>, Ruoyu Wang<sup>1, 2</sup>, Haoran Li<sup>1, 2</sup>, Xiaoping Liao<sup>1, 2, (✉)</sup>, Hongwu Ma<sup>1, 2, (✉)</sup>

<sup>1</sup>Biodesign Center, Key Laboratory of Engineering Biology for Low-carbon Manufacturing, Tianjin Institute of Industrial Biotechnology, Chinese Academy of Sciences, 300308, Tianjin, China.

<sup>2</sup>National Technology Innovation Center of Synthetic Biology, 300308, Tianjin, China

<sup>3</sup>College of Biotechnology, Tianjin University of Science & Technology, Tianjin, China.

✉{liao\_xp, ma\_hw}@tib.cas.cn

## Abstract

This is a supplementary document for the paper "ECRECEr: Enzyme Commission Number Prediction and Benchmarking with Hierarchy Dual-core Multitask Learning Framework". It provides details on preparing the data, selecting models, fine-tuning parameters, performance evaluation, as well as supplementary figures and tables that provide experimental details and support our conclusions. It also includes information on how to use the web service and offline bundles for high-throughput EC number prediction.

## 1 SI Related Work

As EC number prediction is at the core of enzyme functional annotation, a large number of relevant computational techniques have been developed to assign EC numbers to unknown protein sequences. In this section, we will introduce seven of the most representative ones, ordered by their time of publication. The seven representative tools are listed in Table 1. Next, we evaluated these tools based on the latest update time, distribution type (standalone packages, online web-service, or both), usability ('YES' if it is available for use, 'NO' if it is not available, 'Good' if it can be used for high-throughput prediction) and citations of these tools up to 26 Aug 2021.

### 1.1 CatFam

CatFam [10] is a profile-controlled, sequence-based database that can be used to infer the catalytic functions of proteins. CatFam uses an adjustable false positive rate to generate databases on-demand for different needs, such as functional annotation with different precision and hypothesis generation with moderate precision but better recall. CatFam uses profile-specific thresholds to ensure equal precision for each profile and

**Table 1.** Usability of 7 EC prediction tools

| Tools                 | Last update | Type       | Usability | Citations |
|-----------------------|-------------|------------|-----------|-----------|
| CatFam <sup>1</sup>   | 2009        | standalone | GOOD      | 71        |
| SVMProt <sup>2</sup>  | 2016        | online     | NO        | 88        |
| PRIAM.V2 <sup>3</sup> | 2018        | both       | GOOD      | 365       |
| DEEPre <sup>4</sup>   | 2018        | online     | YES       | 132       |
| ECPred <sup>5</sup>   | 2018        | both       | GOOD      | 40        |
| DEEPEC <sup>6</sup>   | 2019        | standalone | GOOD      | 49        |
| BENZ WS <sup>7</sup>  | 2021        | online     | YES       | 0         |

1. <http://www.bhsai.org/downloads/catfam.tar.gz>
2. <http://bidd.group/cgi-bin/svmprot/svmprot.cgi>
3. [http://priam.prabi.fr/REL\\_JAN18/index\\_jan18.html](http://priam.prabi.fr/REL_JAN18/index_jan18.html)
4. <http://www.cbrc.kaust.edu.sa/DEEPre/index.html>
5. <https://ecpred.kansil.org/>
6. <https://bitbucket.org/kaistsystemsbiology/deepec/src/master/>
7. <https://benzdb.biocomp.unibo.it/>

ensure the best performance for all tasks. Comparison experiments were conducted based on three test sets and 13 bacterial genomes. The results demonstrated that CatFam outperforms PRIAM in terms of precision and coverage. CatFam has been developed for more than 12 years. Although the precision is not as good as in the latest ones, the recall remains good, and its code is still available. We, therefore, used CatFam as one of our baselines in this work.

## 1.2 SVM-Prot

SVM-Prot V2016 [6] is a machine-learning method that was first published in 2003 and then updated in 2016. SVM-Prot is supplementary for predicting diverse classes of proteins compared with distantly-related or homologous-related methods. SVM-Prot employs 13 manually curated physicochemical features of proteins as inputs, nine of which are from Pse-in-One [7], while the remaining four are self-calculated, such as molecular weight and solubility. The algorithm then uses these features to train an integrated SVM, KNN, PNN, and Blast model, to predict the EC numbers for new proteins. Sensitivity, precision, and specificity are evaluated on an independent evaluation dataset, which demonstrated the outstanding performance of SVM-Prot. However, to train an SVM classifier the time complexity is  $O(n^2p + n^3)$  [1], which is extremely time-consuming. More importantly, the web service provided by SVM-Prot is no longer available, and they did not provide their code for reimplement and evaluation. Hence, the usability of SVM-Prot is weak.

## 1.3 PRIAM-V2

PRIAM V2 [3] is a rules-based method for automated enzyme annotation with EC numbers proposed in 2003, with an updated version V2 published in 2018. It takes protein or nucleotide sequences as inputs and annotates them with EC numbers on an individual sequence level or a genome level. PRIAM utilizes a set of signatures composed of position-specific scoring matrices and patterns for sequence embedding, which is tailored for each enzyme entry to build its model. PRIAM uses the whole Swiss-Prot database to learn parameters and evaluate the method as well. The advantage of PRIAM is its high recall, and the code is available. Accordingly, we used PRIAM V2 as one of our baselines.

---

## 1.4 DEEPre

DEEPre [5] is a supervised end-to-end feature selection and classification model that uses a convolutional neural network (CNN) with a level-by-level strategy to predict enzyme functions. Unlike the above-mentioned method that needs manually curated features, DEEPre takes the raw sequence encoding as inputs, then extracts convolutional and sequential features from the raw encoding based on the classification result to directly boost the model performance. DEEPre is good at determining the main classes of enzymes on a separate low-homology dataset, while the performance is suboptimal when determining the fourth level EC numbers. DEEPre provides a webserver for the public but does not provide the source code for reimplementing and evaluation, and the webserver is not capable of high-throughput prediction. Thus, this algorithm is usable but not user-friendly.

## 1.5 ECPred

ECPred [4] is a supervised hierarchical enzyme function prediction tool based on an ensemble of machine learning that can predict EC numbers to the fourth level. ECPred trains an independent model for each EC number level and uses three predictors, called SPMAP, BLAST-kNN, and Pepstats-SVM, to integrate the output. ECPred was trained and validated using the enzyme entries located in the Swiss-Prot database. ECPred ingeniously constructed a positive set and a negative set to finely control the prediction performance. The experimental results showed its outstanding performance at level 0 EC number prediction. ECPred was published in late 2018. The most significant point of ECPred is its user-friendly workflow that provides both a web service, standalone packages, and the source code. Accordingly, we used ECPred as one of our baselines in this work.

## 1.6 DEEPEC

DeepEC [8] is a deep learning method that enables high-quality and high-throughput prediction of EC numbers. DeepEC uses three CNNs as its major engine and homology analysis as its supplementary engine to conduct EC number prediction. DeepEC predicts if the given amino sequence is an enzyme in the first CNN layer, and then specifies the third level of EC numbers in the second CNN layer, after which it assigns the fourth level in the final CNN layer. The primary objective of DeepEC is high precision, low computing time, and low disk space requirements. DeepEC is sensitive in detecting the effects of mutated domains/binding site residues. DeepEC did not provide a source code for self-training and prediction. It only provides well-trained parameters for local installation and prediction. However, no webserver is given. Considering its good performance in precision, we also used DeepEC as one of our baselines in this work.

## 1.7 BENZ WS

BENZ WS [2] is the latest published web service for four-level EC number annotation. It was first published in May 2021. BENZ WS filters a target sequence with a combined system of HMMs and PFAMs, after which it returns an associated four-level EC number if successful. BENZ WS can annotate both mono- and multifunctional enzymes. Compared with DEEPre and ECPred, BENZ WS is superior in terms of the true positive rate. However, the performance of BENZ WS is relatively inferior in terms of the false-negative rate. BENZ WS only provides a web interface to the end-user, so usability is given, but no source code or standalone suite is available, and the

---

computational time is long. We therefore did not use BENZ WS as a baseline in this work.

## 2 SI Appendix Materials and Methods

### 2.1 Preprocessing

There are six steps (s1-s6) in data preprocessing:

- s1: remove the records with identical IDs, but changed sequences (updated sequences);
- s2: for duplicated records, only keep one;
- s3: make the EC numbers uniform and remove unnecessary spaces;
- s4: based on the EC number, assign a unique label for each sequence;
- s5: organize a uniform dictionary for EC label mapping;
- s6: add enzyme catalytic function quantity labels to protein sequences.

### 2.2 Dataset

A commonly used EC number prediction dataset is the EzyPred dataset from Shen and Zhou, published in 2007 [9]. The EzyPred dataset is a two-level EC number dataset that was extracted from the ENZYME database (released May 1, 2007), with a 40% sequence similarity cutoff. This dataset contains 9,832 two-level specified enzymes and 9850 non-enzymes. The details of this dataset can be found in their published paper [9]. This dataset can only be used to predict two-level EC numbers, and the volume of this dataset is unsuitable for machine learning. Accordingly, the majority of the later studies used a similar approach to extract and construct datasets from Swiss-Prot [8, 5]. The typical steps of constructing the dataset are as follows:

- 1) Obtain the latest reviewed protein data from Swiss-Prot and label the sequences as enzyme or non-enzyme utilizing the protein annotation.
- 2) Exclude the multifunctional enzymes and those enzymes with incomplete EC number annotations.
- 3) Exclude enzymes by sequence length, a typical threshold is  $length \in [50, 50000]$ .
- 4) Use homology analysis tools to remove redundant sequences. The similarity threshold is manually determined, and a typical threshold is 40%.
- 5) Randomly rearrange filtered enzyme data and randomly pick non-enzyme data with a similar size, then mix these data together as a standard dataset.
- 6) Split the standard dataset into a training set and a testing set using a typical 8:2 ratio or split the standard dataset into a training set, validation set, and testing set using a typical 7:1:2 ratio.

However, these principles of dataset construction were explicitly designed for the EC number prediction of monofunctional enzymes and are not suitable for multifunctional enzymes. Moreover, the construction of training and testing datasets using randomly mixed data is not in accordance with the facts and may lead to information leaks. Beyond that, filtering sequences by length and homology may obscure patterns and other information, which will reduce the learning performance. Therefore, the steps of constructing the dataset in this work were more straightforward:

- 1\*) Obtain the latest reviewed protein data from Swiss-Prot and label the sequences with three label vectors: enzyme or non-enzyme, monofunctional (labeled 1 or 0) or multifunctional enzyme (labeled with function counts), EC number (monofunctional enzymes have a single EC number, multifunctional enzymes have more than one EC number).
- 2\*) Rearrange the protein sequence order by annotation updated date.
- 3\*) Use the latest four-year data as the testing set, while the rest is the training and validation set.
- 4\*) We constructed two test sets to validate the methods' prediction efficiency over time. The first one is built using Sprot data from February 2018 to June 2020, namely testset\_20, and the second one is from February 2018 to February 2022, namely testset\_22.

The implementation can be seen in chapter 5 and by referring to our source codes.

### 2.2.1 Task 1 Enzyme and Non-enzyme Dataset

Based on the above mentioned three principles, the enzyme and non-enzyme dataset (Table 2) uses the latest 3 years of Swiss-Prot data as the testing set, and the data before as the training set.

**Table 2.** Description of the Enzyme and Non-enzyme Dataset

| ITEM       | Training set | testset_20 | testset_22 |
|------------|--------------|------------|------------|
| Enzyme     | 222,567      | 3,304      | 5,111      |
| Non-enzyme | 246,567      | 3,797      | 5,503      |
| Total      | 469,134      | 7,101      | 10,614     |

### 2.2.2 Task 2 Multifunctional Enzyme Dataset

For the multifunctional enzyme prediction dataset, to minimize distractions from non-enzymes and balance the dataset, we excluded the non-enzyme data (Table 3). The remaining enzyme data were labeled based on the number of functions (i.e., 1, 2, ..., 8). The details are listed below:

**Table 3.** Description of Multifunctional Enzyme Dataset

| Functions | Records |       |       | Functions | Records |       |       |
|-----------|---------|-------|-------|-----------|---------|-------|-------|
|           | Train   | Test1 | Test2 |           | Train   | Test1 | Test2 |
| 1         | 210,788 | 3,273 | 4,656 | 5         | 206     | 6     | 7     |
| 2         | 9,943   | 208   | 337   | 6         | 80      | 2     | 10    |
| 3         | 993     | 60    | 84    | 7         | 27      | 1     | 1     |
| 4         | 525     | 7     | 13    | 8         | 5       | 0     | 3     |

Train: Training set  
 Test1: Testset\_20  
 Test2: Testset\_22

### 2.2.3 Task 3 Enzyme Commission Number Dataset

Following the three-datasets construction principle, the enzyme commission (EC) number dataset filtered the non-enzyme data after preprocessing. For a comprehensive and fair comparison with the state-of-the-art method DeepEC, we set the end-time of

the training dataset to February 2018. This is because DeepEC only collected data before February 2018 for model training. If we use more recent data it will lead to an information leak problem. The dataset (Table 4) details are listed below:

**Table 4.** Description of the Enzyme Commission Number Dataset

| Item                  | Trainingset | testset_20 | testset_22 |
|-----------------------|-------------|------------|------------|
| Monofunctional        | 210,788     | 3,052      | 4,656      |
| Multifunctional       | 11,779      | 252        | 455        |
| Distinct EC numbers   | 4,854       | 937        | 1,355      |
| Incomplete EC numbers | 209         | 128        | 137        |
| Complete EC numbers   | 4,645       | 809        | 1,218      |
| Oxidoreductases       | 34,169      | 1,065      | 1,615      |
| Transferases          | 79,570      | 1,009      | 1,567      |
| Hydrolases            | 56,749      | 676        | 989        |
| Lyases                | 20,747      | 346        | 608        |
| Isomerases            | 11,927      | 108        | 184        |
| Ligases               | 25,254      | 156        | 244        |
| Translocases          | -           | 57         | 83         |
| Set size              | 222,567     | 7,101      | 5,111      |

### 3 Models

#### 3.1 Optimized parameters

*# Bi-GRU and Attention optimized parameters*

| Layer (type)           | Output Shape      | Param # |
|------------------------|-------------------|---------|
| input (InputLayer)     | n*(1, 1280)       | 0       |
| bi-gru (Bidirectional) | (1, 256)          | 1082880 |
| attention (Attention)  | (256)             | 8225    |
| dense1 (Dense)         | (64)              | 16448   |
| lniear (Dense)         | (num_of(Y_label)) | 130     |

Total params: 1,107,683

Trainable params: 1,107,683

Non-trainable params: 0

#### 3.2 Integration, fine-tuning, and production

As illustrated in Fig. 1, the final EC number prediction output is an integrated process. As shown in SE. 1, we formulated this integrated process as an optimization problem:

$$MAX_{F1} \{f(obj_1, obj_2, obj_3, sa)\} \quad (SE.1)$$

where  $ag_1$ ,  $ag_2$ , and  $ag_3$  are the predicted results from DMLF finetued for task1, task2, task3, respectively, while  $sa$  is the predicted results from multiple sequence alignment. The integration and fine-tuning process aim to maximize the optimizing objective. In

this work, the objective was the performance of EC number prediction in terms of the F1 score. We used a greedy strategy to finish this optimization.

186  
187

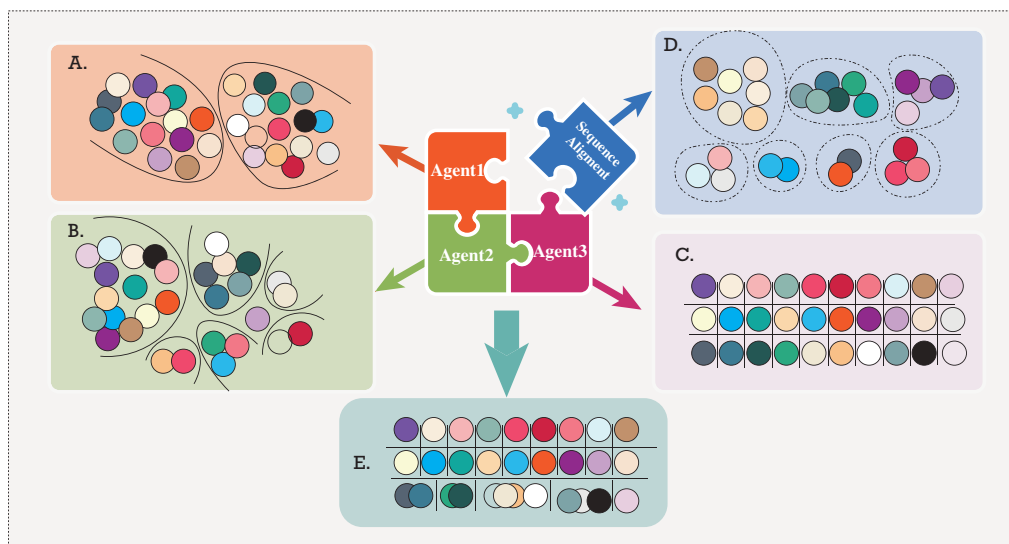

Figure 1. The integration and fine-tuning process before output.

## 4 SI Appendix Figures

188

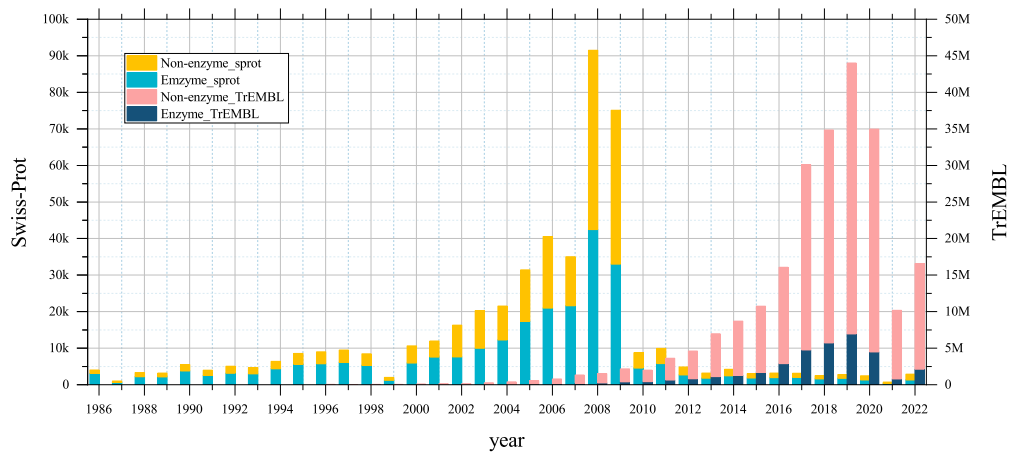

Figure 2. The number of records integrated into TrEMBL vs. Swiss-Prot since 1986.

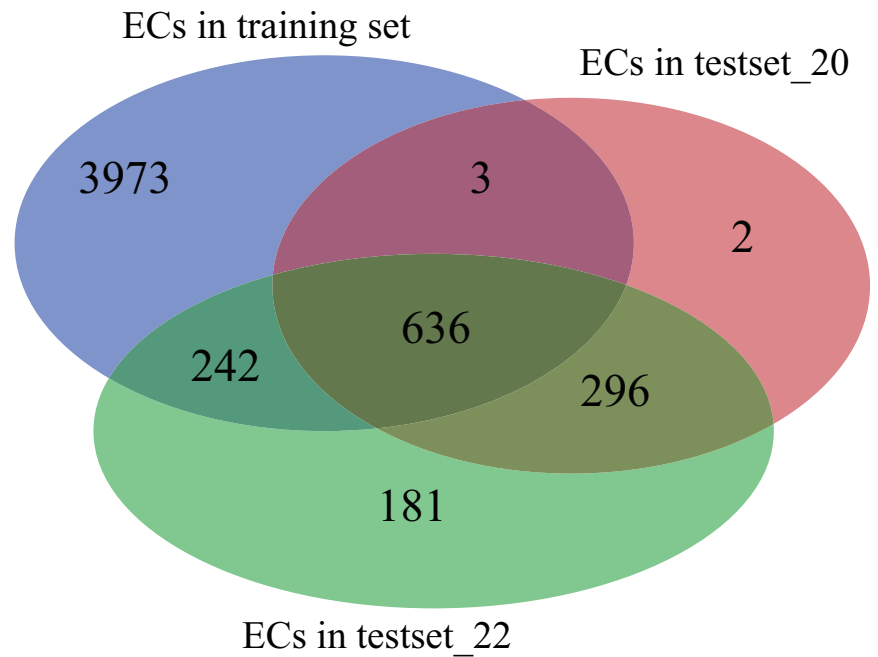

**Figure 3.** Venn diagram of the training and testing datasets

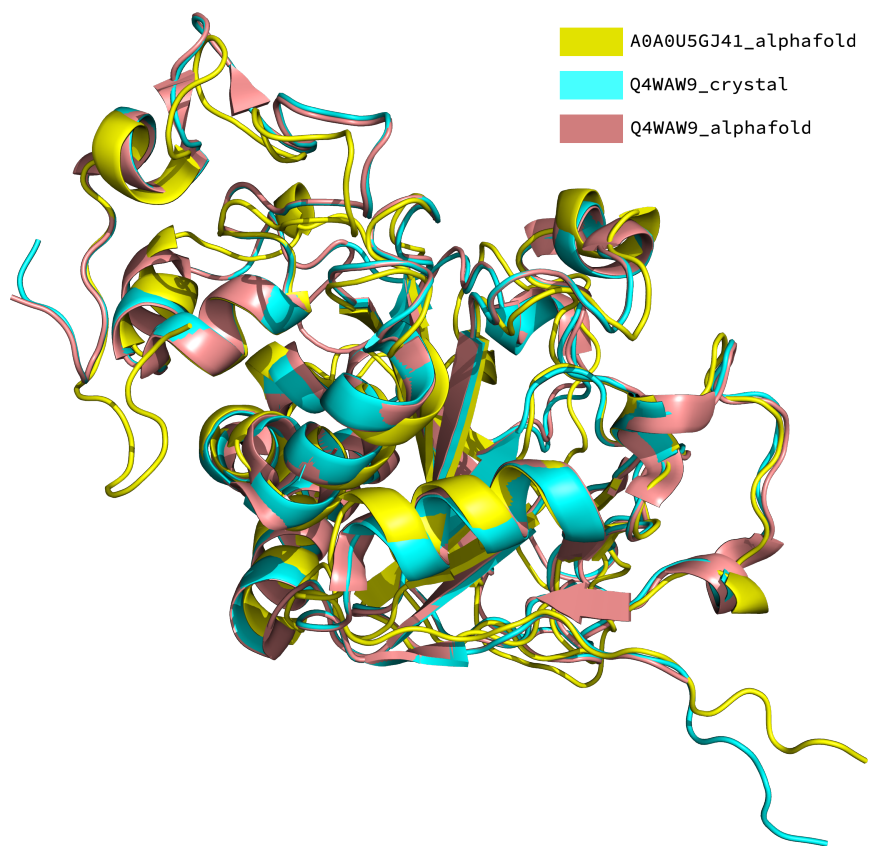

**Figure 4.** Structure alignment of proteins A0A0U5GJ41 and Q4WAW9.



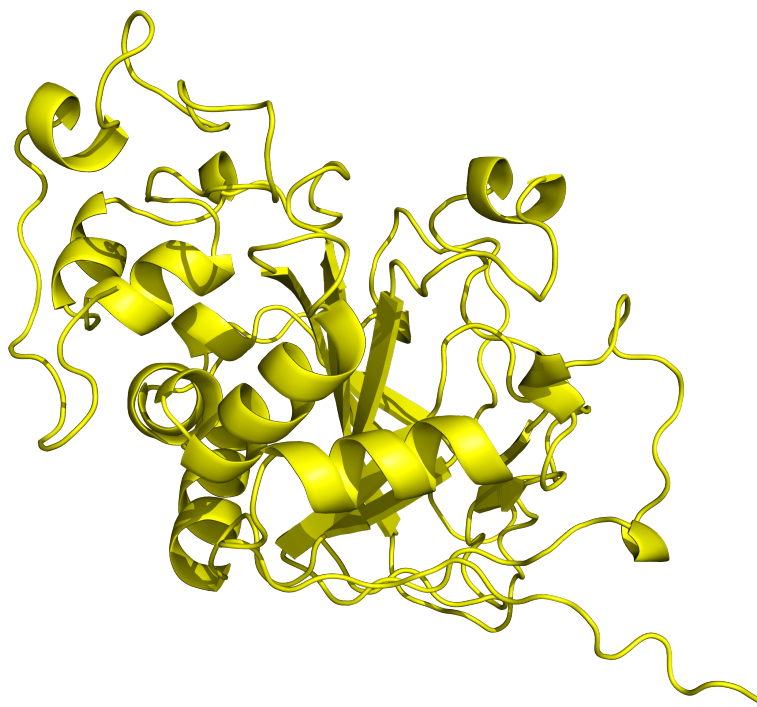

**Figure 5.** Structure of protein A0A0U5GJ41 (predicted using alphafold2).

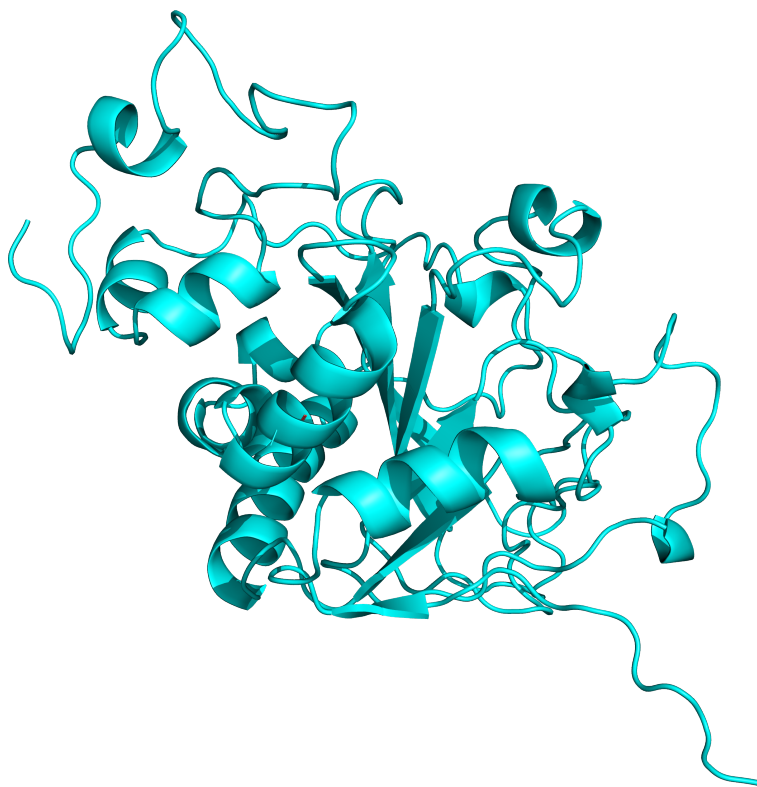

**Figure 6.** Structure of protein Q4WAW9 (predicted using alphafold2).

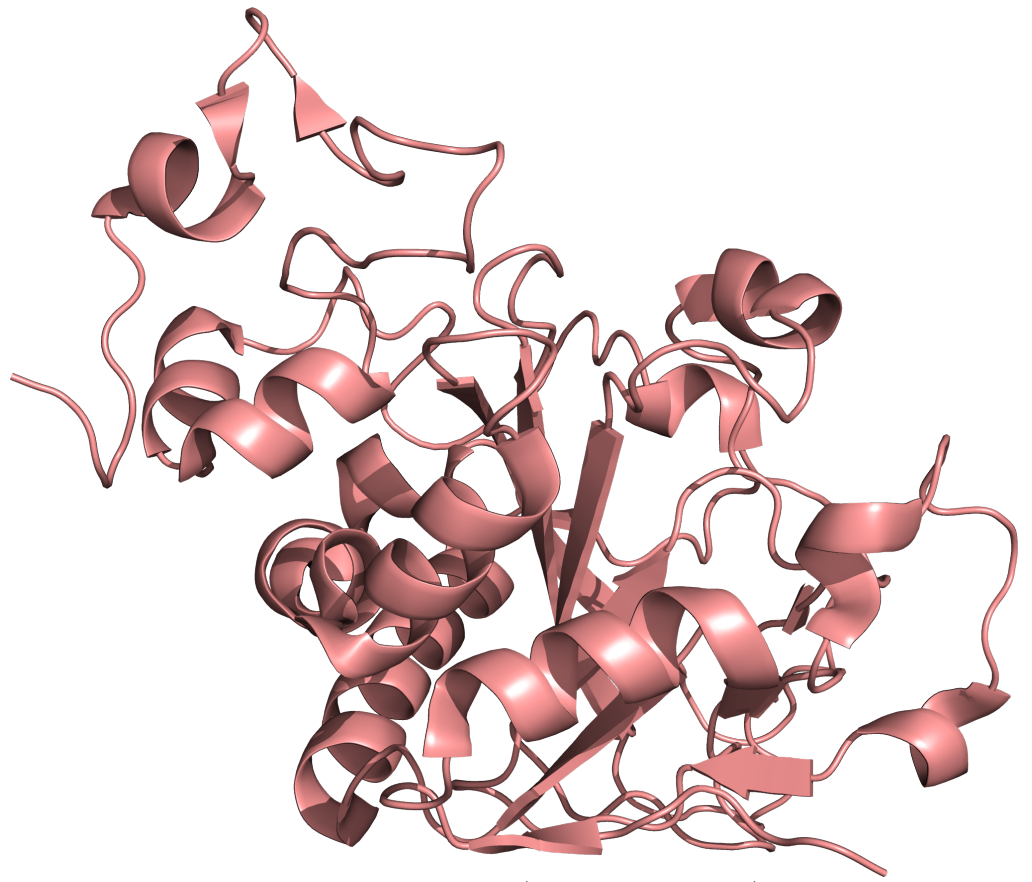

**Figure 7.** Structure for protein Q4WAW9 (alphafold2 predicted).

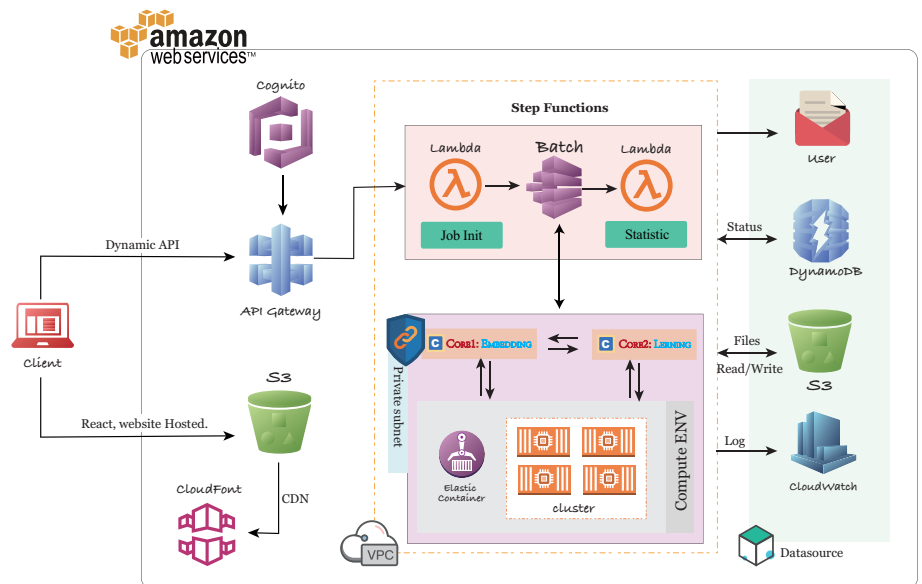

Figure 8. The software architecture of the web platform.

## 5 SI Algorithm

---

### Algorithm 1 Prepare benchmarking datasets

---

```

1: download raw data from uniprot.org           ▷ prepare_task_dataset.ipynb # Step 3
2:   train_data ← uniprot_sprot - only2018_02.tar.gz
3:   test_data ← uniprot_sprot - only2020_06.tar.gz
4:   test_data ← uniprot_sprot - only2022_02.tar.gz
5: extract protein records from downloaded data ▷ prepare_task_dataset.ipynb # Step
  4
6:   extract protein id
7:   extract protein name
8:   extract protein ec.number
9:   extract protein sequence as seq
10:  format ec.number and seq
11:  caculate protein arrtributes.                ▷ exact_ec_from_uniprot.py
12: preprocessing protein records                ▷ prepare_task_dataset.ipynb # Step 6
13:  drop duplicates by seq
14:  remove changed seq with same id
15:  format ec.number in standard four level like: -.-.-
16:  trim ec.number and seq strings
17: get esm embedding                            ▷ prepare_task_dataset.ipynb # Step 6.6
18: get unirep embeeding                        ▷ prepare_task_dataset.ipynb # Step 6.7
19: Construct task1 dataset ds1                ▷ prepare_task_dataset.ipynb # Step 7.1
20: Construct task2 dataset ds2                ▷ prepare_task_dataset.ipynb # Step 7.2
21: Construct task3 dataset ds3                ▷ prepare_task_dataset.ipynb # Step 7.3

```

---

### Algorithm 2 EC Number Prediction

---

```

1: load trainset and testset from ds3           ▷ task3.ipynb # Step 2
2: load embedding features                       ▷ task3.ipynb # Step 3
3: conduct sequence alignment                   ▷ task3.ipynb # Step 4
4: transfer EC number to model labels           ▷ task3.ipynb # Step 5
5: train EC prediction model                    ▷ task3.ipynb # Step 6
6: do EC prediction                             ▷ task3.ipynb # Step 7
7: return prediction results

```

---

---

**Algorithm 3** Enzyme or Non-enzyme Prediction

---

```
1: load trainset and testset from ds1                                ▷ task1.ipynb # Step 2
2: conduct sequence alignment                                          ▷ task1.ipynb # Step 3
3: embedding comparison                                              ▷ task1.ipynb # Step 4
4:   one-hot embedding                                               ▷ task1.ipynb # Step 4.1
5:   unirep embedding                                               ▷ task1.ipynb # Step 4.2
6:   esm layer 33 embedding                                          ▷ task1.ipynb # Step 4.3
7:   esm layer 32 embedding                                          ▷ task1.ipynb # Step 4.4
8:   esm layer 0 embedding                                           ▷ task1.ipynb # Step 4.5
9: DMLF for enzyme or non-enzyme prediction                          ▷ task1.ipynb # Step 5
10:  learn model using KNN method on train_data
11:  predict enzyme or non-enzyme on test_data using learned model
12:  integrate KNN prediction with sequence alignment prediction
13: if sequence alignment found homologous sequence then
14:   use alignment results as prediction
15: else
16:   use KNN results as prediction
   return prediction
```

---

---

**Algorithm 4** Enzyme Catalytic Function Quantity Prediction

---

```
1: load trainset and testset from ds2                                ▷ task2.ipynb # Step 2
2: load esm32 embedding features                                       ▷ task2.ipynb # Step 3
3: conduct single or multi functions prediction benchmarking sp     ▷ task2.ipynb # Step
  4.1
4: conduct 2-8 functions prediction benchmarking mp                 ▷ task2.ipynb # Step 4.2
5: do sequences alignment
6: do function counts prediction
7: integrate and output results                                       ▷ task2.ipynb # Step 5.3
8: if sequence alignment found homologous sequence then
9:   use alignment results as prediction
10: else if sp prediction is single functional then
11:   prediction is sp results
12: else
13:   use mp results
   return prediction results
```

---

---

## 6 SI Appendix Tables

**Table 5.** Benchmarking Data Description

| ITEM              | Snapshot      |           |               |
|-------------------|---------------|-----------|---------------|
|                   | February-2018 | June-2020 | February-2022 |
| Records           | 556,825       | 563,972   | 567,483       |
| Duplicate Removal | 469,129       | 476,006   | 479,426       |
| Non-enzyme        | 246,562       | 247,319   | 247,338       |
| Enzyme            | 222,565       | 228,687   | 232,088       |
| Distinct EC       | 4854          | 5306      | 5570          |

**Table 6.** Protein Sequences Embedding Performance Comparison on Enzyme or Non-Enzyme Prediction Task

| Method              | Baseline | ACC    | PPV    | NPV    | RC     | F1     | Confusion Matrix |      |      |      |
|---------------------|----------|--------|--------|--------|--------|--------|------------------|------|------|------|
|                     |          |        |        |        |        |        | TP               | FP   | FN   | TN   |
| Logistic Regression | one-hot  | 0.6473 | 0.5886 | 0.7120 | 0.6924 | 0.6363 | 2478             | 1732 | 1101 | 2722 |
|                     | Unirep   | 0.8368 | 0.8593 | 0.8222 | 0.7578 | 0.8053 | 2712             | 444  | 867  | 4010 |
|                     | ESM0     | 0.7561 | 0.7209 | 0.7857 | 0.7385 | 0.7296 | 2643             | 1023 | 936  | 3431 |
|                     | ESM32    | 0.9066 | 0.9209 | 0.8964 | 0.8648 | 0.8919 | 3095             | 266  | 484  | 4188 |
|                     | ESM33    | 0.9032 | 0.9204 | 0.8909 | 0.8567 | 0.8874 | 3066             | 265  | 513  | 4189 |
| KNN                 | one-hot  | 0.6330 | 0.6686 | 0.6222 | 0.3495 | 0.4591 | 1251             | 620  | 2328 | 3834 |
|                     | Unirep   | 0.8486 | 0.8670 | 0.8363 | 0.7798 | 0.8211 | 2791             | 428  | 788  | 4026 |
|                     | ESM0     | 0.8246 | 0.7892 | 0.8556 | 0.8273 | 0.8078 | 2961             | 791  | 618  | 3663 |
|                     | ESM32    | 0.9294 | 0.9411 | 0.9208 | 0.8977 | 0.9189 | 3213             | 201  | 366  | 4253 |
|                     | ESM33    | 0.9273 | 0.9360 | 0.9208 | 0.8983 | 0.9167 | 3215             | 220  | 364  | 4234 |
| XGboost             | one-hot  | 0.7087 | 0.6851 | 0.7256 | 0.6407 | 0.6621 | 2293             | 1054 | 1286 | 3400 |
|                     | Unirep   | 0.8651 | 0.8885 | 0.8494 | 0.7972 | 0.8404 | 2853             | 358  | 726  | 4096 |
|                     | ESM0     | 0.8282 | 0.8197 | 0.8346 | 0.7877 | 0.8034 | 2819             | 620  | 760  | 3834 |
|                     | ESM32    | 0.9254 | 0.9540 | 0.9057 | 0.8748 | 0.9127 | 3131             | 151  | 448  | 4303 |
|                     | ESM33    | 0.9157 | 0.9443 | 0.8962 | 0.8617 | 0.9011 | 3084             | 182  | 495  | 4272 |
| Decision tree       | one-hot  | 0.6283 | 0.5889 | 0.6562 | 0.5488 | 0.5681 | 1964             | 1371 | 1615 | 3083 |
|                     | Unirep   | 0.7966 | 0.7951 | 0.7976 | 0.7320 | 0.7623 | 2620             | 675  | 959  | 3779 |
|                     | ESM0     | 0.7621 | 0.7437 | 0.7758 | 0.7111 | 0.7270 | 2545             | 877  | 1034 | 3577 |
|                     | ESM32    | 0.8422 | 0.8550 | 0.8334 | 0.7776 | 0.8145 | 2783             | 472  | 796  | 3982 |
|                     | ESM33    | 0.8311 | 0.8442 | 0.8223 | 0.7614 | 0.8006 | 2725             | 503  | 854  | 3951 |
| Random forest       | one-hot  | 0.7162 | 0.6768 | 0.7493 | 0.6946 | 0.6856 | 2486             | 1187 | 1093 | 3267 |
|                     | Unirep   | 0.8634 | 0.9151 | 0.8328 | 0.7645 | 0.8330 | 2736             | 254  | 843  | 4200 |
|                     | ESM0     | 0.8539 | 0.8636 | 0.8470 | 0.7980 | 0.8295 | 2856             | 451  | 723  | 4003 |
|                     | ESM32    | 0.9157 | 0.9657 | 0.8841 | 0.8407 | 0.8989 | 3009             | 107  | 570  | 4347 |
|                     | ESM33    | 0.9161 | 0.9610 | 0.8871 | 0.8460 | 0.8999 | 3028             | 123  | 551  | 4331 |
| GBDT                | one-hot  | 0.6775 | 0.6163 | 0.7461 | 0.7315 | 0.6690 | 2618             | 1630 | 961  | 2824 |
|                     | Unirep   | 0.8332 | 0.8738 | 0.8091 | 0.7312 | 0.7962 | 2617             | 378  | 962  | 4076 |
|                     | ESM0     | 0.8210 | 0.8100 | 0.8293 | 0.7815 | 0.7955 | 2797             | 656  | 782  | 3798 |
|                     | ESM32    | 0.8720 | 0.9050 | 0.8507 | 0.7963 | 0.8472 | 2850             | 299  | 729  | 4155 |
|                     | ESM33    | 0.8658 | 0.9017 | 0.8431 | 0.7843 | 0.8389 | 2807             | 306  | 772  | 4148 |

**Table 7.** Protein Sequence Embedding Performance on Multifunctional Enzyme Prediction Task

| Baseline            | Method  | ACC    | Precision-Macro | Recall-Macro | F1-Macro |
|---------------------|---------|--------|-----------------|--------------|----------|
| Logistic regression | One-hot | 0.9016 | 0.4485          | 0.2133       | 0.2206   |
|                     | Unirep  | 0.9234 | 0.8462          | 0.1428       | 0.1372   |
|                     | ESM0    | 0.9237 | 0.9891          | 0.1429       | 0.1372   |
|                     | ESM32   | 0.9168 | 0.8205          | 0.3100       | 0.3719   |
|                     | ESM33   | 0.9210 | 0.7792          | 0.4365       | 0.4897   |
| KNN                 | One-hot | 0.9180 | 0.6498          | 0.3601       | 0.3511   |
|                     | Unirep  | 0.9044 | 0.5790          | 0.1479       | 0.1474   |
|                     | ESM0    | 0.9156 | 0.6195          | 0.4261       | 0.4672   |
|                     | ESM32   | 0.9274 | 0.6317          | 0.5459       | 0.5773   |
|                     | ESM33   | 0.9280 | 0.7974          | 0.5644       | 0.5994   |
| XGboost             | One-hot | 0.9252 | 0.8941          | 0.2374       | 0.2841   |
|                     | Unirep  | 0.9192 | 0.8822          | 0.1480       | 0.1475   |
|                     | ESM0    | 0.9258 | 0.8512          | 0.3878       | 0.4332   |
|                     | ESM32   | 0.9389 | 0.9422          | 0.5101       | 0.5931   |
|                     | ESM33   | 0.9380 | 0.9441          | 0.4626       | 0.5405   |
| Decision tree       | one-hot | 0.8593 | 0.3079          | 0.2185       | 0.2305   |
|                     | Unirep  | 0.8647 | 0.5951          | 0.1430       | 0.1440   |
|                     | ESM0    | 0.8786 | 0.5263          | 0.2531       | 0.2869   |
|                     | ESM32   | 0.8874 | 0.3937          | 0.5412       | 0.3984   |
|                     | ESM33   | 0.8814 | 0.3948          | 0.3862       | 0.2604   |
| Random forest       | One-hot | 0.9262 | 0.9419          | 0.2397       | 0.2887   |
|                     | Unirep  | 0.9210 | 0.8462          | 0.1424       | 0.1370   |
|                     | ESM0    | 0.9280 | 0.9421          | 0.3869       | 0.4317   |
|                     | ESM32   | 0.9343 | 0.9394          | 0.4640       | 0.5398   |
|                     | ESM33   | 0.9322 | 0.9271          | 0.4283       | 0.4997   |
| GBDT                | One-hot | 0.9125 | 0.1820          | 0.3125       | 0.1680   |
|                     | Unirep  | 0.9228 | 0.8462          | 0.1427       | 0.1371   |
|                     | ESM0    | 0.9240 | 0.5991          | 0.4407       | 0.3403   |
|                     | ESM32   | 0.9271 | 0.6479          | 0.3135       | 0.3643   |
|                     | ESM33   | 0.9231 | 0.6347          | 0.4828       | 0.3178   |

**Table 8.** EC Number Prediction Performance Comparison

| baseline | <i>mACC</i> | <i>mPR</i> | <i>mRecall</i> | <i>mF1</i> | dataset    |
|----------|-------------|------------|----------------|------------|------------|
| ECPred   | 0.2458      | 0.8042     | 0.2630         | 0.2955     | testset_20 |
| DeepEC   | 0.3011      | 0.8121     | 0.3794         | 0.3011     |            |
| CatFam   | 0.2760      | 0.8323     | 0.3507         | 0.2760     |            |
| PRIAM-V2 | 0.2457      | 0.2080     | 0.7848         | 0.2457     |            |
| Ours     | 0.8619      | 0.6900     | 0.8388         | 0.6176     |            |
| ECPred   | 0.2350      | 0.8552     | 0.1620         | 0.1820     | testset_22 |
| DeepEC   | 0.2003      | 0.7910     | 0.2879         | 0.1049     |            |
| CatFam   | 0.2763      | 0.8858     | 0.1916         | 0.0837     |            |
| PRIAM-V2 | 0.2426      | 0.2503     | 0.7526         | 0.0452     |            |
| Ours     | 0.8742      | 0.7721     | 0.8090         | 0.6445     |            |



**Table 9.** Enzyme or None-enzyme Prediction Performance Comparison-testset\_20

| Baseline   | ACC    | PPV    | NPV    | RC     | F1     | Confusion Matrix |      |      |      |     |      |
|------------|--------|--------|--------|--------|--------|------------------|------|------|------|-----|------|
|            |        |        |        |        |        | TP               | FP   | FN   | TN   | UP  | UN   |
| testset_20 |        |        |        |        |        |                  |      |      |      |     |      |
| ECPred     | 0.7219 | 0.8218 | 0.9190 | 0.8463 | 0.8339 | 3029             | 657  | 244  | 277  | 306 | 1027 |
| DeepEC     | 0.6715 | 0.9468 | 0.6300 | 0.2783 | 0.4301 | 996              | 56   | 2583 | 4398 | 0   | 0    |
| CatFam     | 0.6502 | 0.8050 | 0.6214 | 0.2836 | 0.4194 | 1015             | 246  | 2564 | 4208 | 0   | 0    |
| PRIAMV2    | 0.7410 | 0.6486 | 0.8967 | 0.9137 | 0.7586 | 3270             | 1772 | 309  | 2682 | 0   | 0    |
| Ours       | 0.9312 | 0.9525 | 0.9160 | 0.8899 | 0.9201 | 3185             | 159  | 394  | 4295 | 0   | 0    |
| testset_22 |        |        |        |        |        |                  |      |      |      |     |      |
| ECPred     | 0.8021 | 0.7525 | 0.8655 | 0.8775 | 0.8102 | 4485             | 1454 | 144  | 4028 | 21  | 482  |
| DeepEC     | 0.6383 | 0.9441 | 0.5906 | 0.2645 | 0.4133 | 1352             | 80   | 3759 | 5423 | 0   | 0    |
| CatFam     | 0.5944 | 0.9278 | 0.5619 | 0.1710 | 0.2888 | 874              | 68   | 4237 | 5435 | 0   | 0    |
| PRIAM-V2   | 0.7473 | 0.6780 | 0.8721 | 0.9051 | 0.7753 | 4626             | 2197 | 85   | 3306 | 0   | 0    |
| Ours       | 0.9324 | 0.9179 | 0.9493 | 0.9549 | 0.9361 | 5255             | 470  | 248  | 4641 | 0   | 0    |

**Table 10.** Multifunctional Enzyme Prediction Performance Comparison

| baseline   | accuracy | precision-macro | recall-macro | f1-macro |
|------------|----------|-----------------|--------------|----------|
| testset_20 |          |                 |              |          |
| ECPred     | 0.9189   | 0.8654          | 0.2493       | 0.1197   |
| DeepEC     | 0.2216   | 0.1238          | 0.0330       | 0.0522   |
| CatFam     | 0.9237   | 0.9891          | -            | -        |
| PRIAM-V2   | 0.1311   | 0.2292          | 0.0446       | 0.0747   |
| Ours       | 0.9171   | 0.5837          | 0.5520       | 0.5605   |
| testset_22 |          |                 |              |          |
| ECPred     | 0.9069   | 0.8790          | 0.2217       | 0.1057   |
| DeepEC     | 0.9063   | 0.8177          | 0.1354       | 0.1389   |
| CatFam     | 0.9102   | 0.6622          | 0.1592       | 0.1749   |
| PRIAM-V2   | 0.1327   | 0.0095          | 0.9309       | 0.0032   |
| Ours       | 0.9245   | 0.7068          | 0.5956       | 0.5745   |

**Table 11.** First-level EC Prediction Performance Comparison

| baselineName | accuracy | precision-macro | recall-macro | f1-macro |
|--------------|----------|-----------------|--------------|----------|
| testset_20   |          |                 |              |          |
| ECPred       | 0.7879   | 0.9127          | 0.2824       | 0.3193   |
| DeepEC       | 0.3197   | 0.8513          | 0.4247       | 0.3994   |
| CatFam       | 0.3558   | 0.8579          | 0.3684       | 0.3287   |
| PRIAM-V2     | 0.3037   | 0.2996          | 0.8969       | 0.3052   |
| Ours         | 0.9125   | 0.7679          | 0.8571       | 0.6365   |
| testset_22   |          |                 |              |          |
| ECPred       | 0.7803   | 0.9144          | 0.2200       | 0.1883   |
| DeepEC       | 0.2411   | 0.8628          | 0.4524       | 0.4096   |
| CatFam       | 0.3571   | 0.9172          | 0.2162       | 0.1253   |
| PRIAM-V2     | 0.3039   | 0.2960          | 0.9003       | 0.4045   |
| Ours         | 0.9130   | 0.7815          | 0.8317       | 0.6663   |

**Table 12.** Second-level EC Prediction Performance Comparison

| baselineName | accuracy | precision-macro | recall-macro | f1-macro |
|--------------|----------|-----------------|--------------|----------|
| testset_20   |          |                 |              |          |
| ECPred       | 0.5479   | 0.8389          | 0.2725       | 0.3135   |
| DeepEC       | 0.3153   | 0.8510          | 0.4054       | 0.3409   |
| CatFam       | 0.3550   | 0.8430          | 0.3611       | 0.3091   |
| PRIAM-V2     | 0.2882   | 0.2895          | 0.8623       | 0.2815   |
| Ours         | 0.8966   | 0.7654          | 0.8425       | 0.6253   |
| testset_22   |          |                 |              |          |
| ECPred       | 0.5572   | 0.9029          | 0.2132       | 0.1878   |
| DeepEC       | 0.2275   | 0.8625          | 0.3154       | 0.3717   |
| CatFam       | 0.3390   | 0.9133          | 0.2016       | 0.1184   |
| PRIAM-V2     | 0.2882   | 0.2790          | 0.8630       | 0.2903   |
| Ours         | 0.8865   | 0.7801          | 0.8246       | 0.6605   |

**Table 13.** Third-level EC Prediction Performance Comparison

| baselineName | accuracy | precision-macro | recall-macro | f1-macro |
|--------------|----------|-----------------|--------------|----------|
| testset_20   |          |                 |              |          |
| ECPred       | 0.2458   | 0.8042          | 0.2630       | 0.2955   |
| DeepEC       | 0.3011   | 0.8121          | 0.3794       | 0.3011   |
| CatFam       | 0.2760   | 0.8323          | 0.3507       | 0.2760   |
| PRIAM-V2     | 0.2457   | 0.2080          | 0.7848       | 0.2457   |
| Ours         | 0.8619   | 0.6900          | 0.8388       | 0.6176   |
| testset_22   |          |                 |              |          |
| ECPred       | 0.2350   | 0.8552          | 0.1620       | 0.1820   |
| DeepEC       | 0.2003   | 0.7910          | 0.2879       | 0.1049   |
| CatFam       | 0.2763   | 0.8858          | 0.1916       | 0.0837   |
| PRIAM-V2     | 0.2426   | 0.2503          | 0.7526       | 0.0452   |
| Ours         | 0.8742   | 0.7721          | 0.8090       | 0.6445   |

---

## References

1. A. Abdiansah and R. Wardoyo. Time complexity analysis of support vector machines (svm) in libsvm. *International journal computer and application*, 128(3):28–34, 2015.
2. D. Baldazzi, C. Savojardo, P. L. Martelli, and R. Casadio. Benz ws: the bologna enzyme web server for four-level ec number annotation. *Nucleic Acids Research*, 49:w60–w66, 2021.
3. C. Claudel-Renard, C. Chevalet, T. Faraut, and D. Kahn. Enzyme-specific profiles for genome annotation: Priam. *Nucleic acids research*, 31(22):6633–6639, 2003.
4. A. Dalkiran, A. S. Rifaioğlu, M. J. Martin, R. Cetin-Atalay, V. Atalay, and T. Doğan. Ecpred: a tool for the prediction of the enzymatic functions of protein sequences based on the ec nomenclature. *BMC bioinformatics*, 19(1):1–13, 2018.
5. Y. Li, S. Wang, R. Umarov, B. Xie, M. Fan, L. Li, and X. Gao. Deepre: sequence-based enzyme ec number prediction by deep learning. *Bioinformatics*, 34(5):760–769, 2018.
6. Y. H. Li, J. Y. Xu, L. Tao, X. F. Li, S. Li, X. Zeng, S. Y. Chen, P. Zhang, C. Qin, C. Zhang, et al. Svm-prot 2016: a web-server for machine learning prediction of protein functional families from sequence irrespective of similarity. *PLoS one*, 11(8):e0155290, 2016.
7. B. Liu, F. Liu, X. Wang, J. Chen, L. Fang, and K.-C. Chou. Pse-in-one: a web server for generating various modes of pseudo components of dna, rna, and protein sequences. *Nucleic acids research*, 43(W1):W65–W71, 2015.
8. J. Y. Ryu, H. U. Kim, and S. Y. Lee. Deep learning enables high-quality and high-throughput prediction of enzyme commission numbers. *Proceedings of the National Academy of Sciences*, 116(28):13996–14001, 2019.
9. H.-B. Shen and K.-C. Chou. Ezympred: a top-down approach for predicting enzyme functional classes and subclasses. *Biochemical and biophysical research communications*, 364(1):53–59, 2007.
10. C. Yu, N. Zavaljevski, V. Desai, and J. Reifman. Genome-wide enzyme annotation with precision control: Catalytic families (catfam) databases. *Proteins: Structure, Function, and Bioinformatics*, 74(2):449–460, 2009.
